# Supplementary material for: Insights into the hydrogen bond network topology of phosphoric acid and water systems
Source: Royal Society of Chemistry journal article supplement (doi:10.1039/d0cp05126h), 2021-01-01
Supplement: d0cp05126h1.pdf [file d0cp05126h1.pdf]

## Supporting Information

Insights into the hydrogen bond network topology of phosphoric acid and water systems

Austėja Mikalčiūtė<sup>a</sup> and Linas Vilčiauskas<sup>\*a,b</sup>

<sup>a</sup>Institute of Chemistry, Vilnius University, Saulėtekio al. 3, LT-10257, Vilnius, Lithuania.

<sup>b</sup>Center for Physical Sciences and Technology (FTMC), Saulėtekio al. 3, LT-10257, Vilnius, Lithuania.

\*E-mail: linas.vilciauskas@chgf.vu.lt

### 1 Force field benchmarks for H<sub>3</sub>PO<sub>4</sub>

#### 1.1 Liquid densities

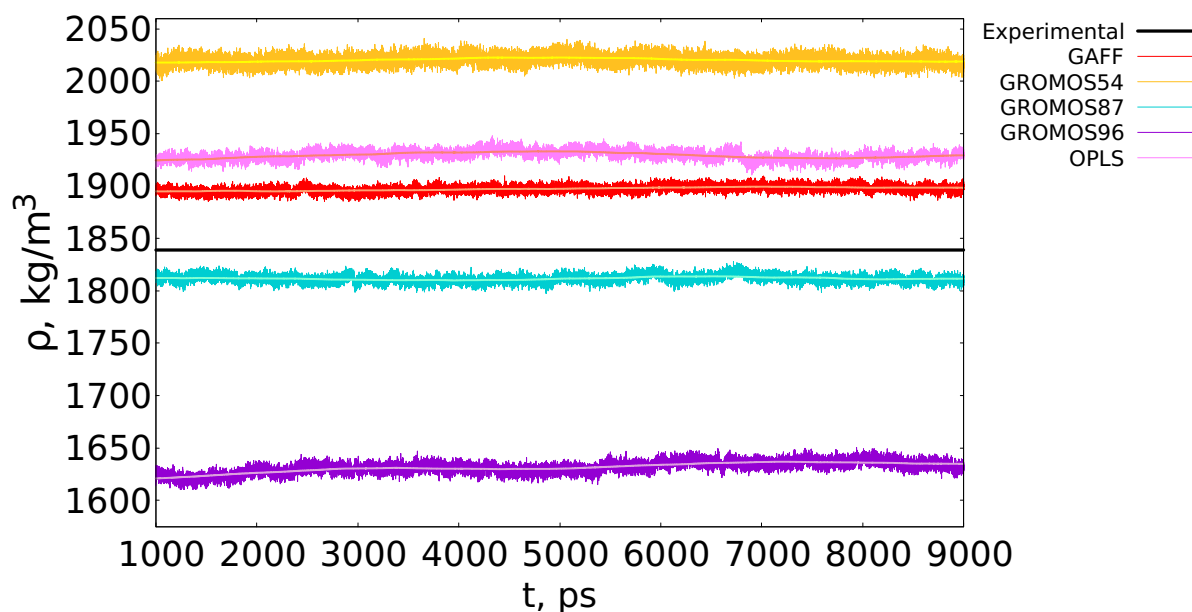

Figure 1: Molecular dynamics simulations of liquid H<sub>3</sub>PO<sub>4</sub> in NPT ensemble. The experimental density is marked by a black line.

## 1.2 Radial Distribution Functions (RDF)

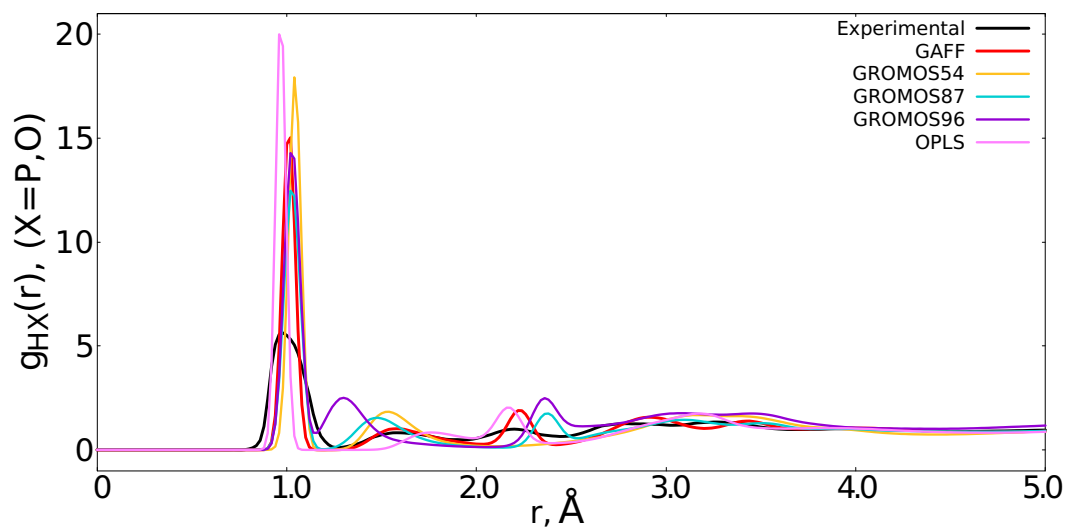

Figure 2: Molecular dynamics simulated  $g_{HX}(r)$ , ( $X = P, O$ ) RDFs of liquid  $H_3PO_4$  in NPT ensemble.

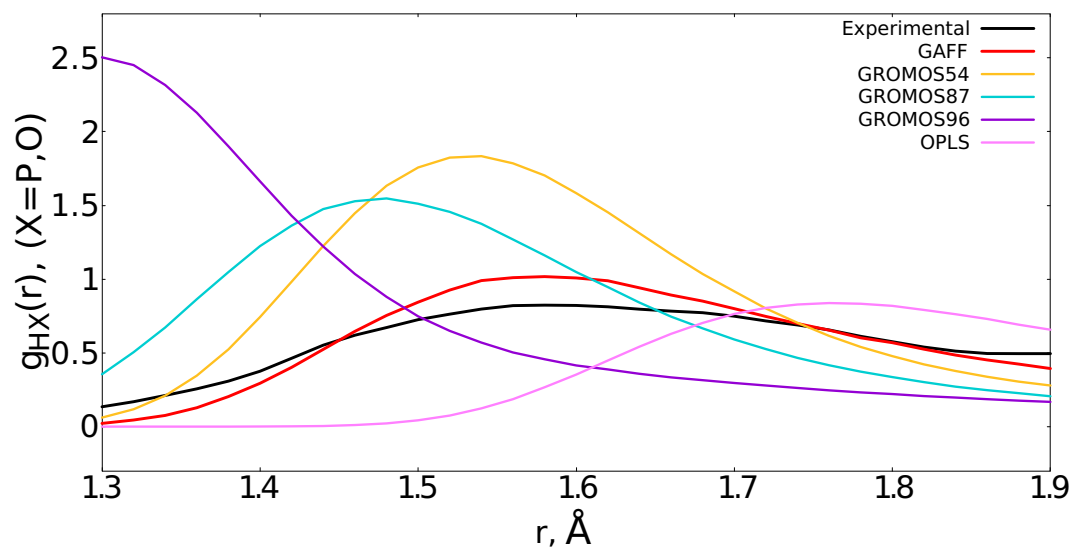

Figure 3: Molecular dynamics simulated  $g_{HX}(r)$ , ( $X = P, O$ ) RDFs of liquid  $H_3PO_4$  in NPT ensemble. Hydrogen bonding region between 1.3 Å and 1.9 Å.
